# Supplementary material for: Characterization of genes required for both Rpg1 and rpg4-mediated wheat stem rust resistance in barley
Source: PubMed Central journal article supplement (PMC6570958; doi:10.1186/s12864-019-5858-z), 2019-06-14

Figure S4

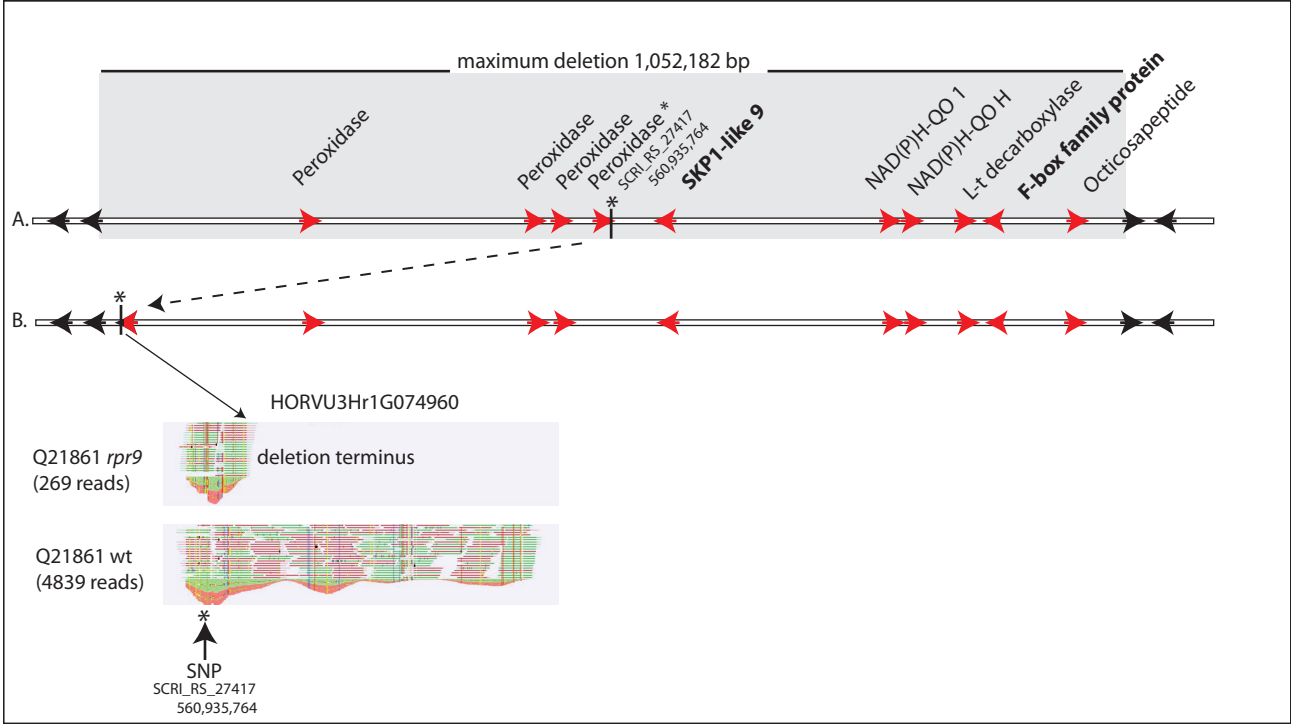

Supplement: 12864_2019_5858_MOESM7_ESM.pdf [file 12864_2019_5858_MOESM7_ESM.pdf]
